# Supplementary material
Source: PubMed Central journal article supplement (PMC2278019)
Supplement: NIHMS37367-supplement-01.pdf [file NIHMS37367-supplement-01.pdf]

## Supplemental Data

### Short Article

## Interferon-Regulatory Factors

### Are Transcriptional Regulators of Adipogenesis

Jun Eguchi, Qing-Wu Yan, Dustin E. Schones, Michael Kamal, Chung-Hsin Hsu, Michael Q. Zhang, Gregory E. Crawford, and Evan D. Rosen

#### Supplemental Experimental Procedures

##### Identification of Conserved Islands

We identified murine regions of interest around the twenty-seven adipocyte-selective genes as follows. Our regions extended 50 kb upstream of each gene, or until the nearest exon from a neighboring gene was encountered. We also included the first intron, and in the small number of cases in which the first intron was small we also added the largest intron. These regions were mapped to the human genome and conserved islands were identified using a sliding window of 70 bp. Those windows for which at least 56 human bp (80% of 70bp) aligned to dog and either mouse or rat, and showing at least 80% identity against dog, and at least 73% identity for either mouse or rat were identified as conserved windows.

Next, adjacent conserved windows separated by no more than 30bp were merged into contiguous genomic regions; those regions extending over at least 80bp became the list of conserved islands. For five genes (*Retn*, *Adn*, *Adpn*, *Fasn*, *Pparg*) the percent identity had to be lowered to 70% (for dog and rodent) to obtain enough conserved islands. Each conserved human island was assigned corresponding location in the mouse genome through the underlying genomic alignments. Primers were devised to flank these regions and to generate amplicons of <250 bp; in cases where a conserved island was too large to be contained in one amplicon of <250 bp, we split the island into multiple primer sets (see Table S4).

##### DNase Hypersensitivity Analysis

3T3-L1 pre-adipocytes and adipocytes were harvested by scraping, suspended in PBS and centrifuged for 10 min at 4°C. Pellets were resuspended in TNM buffer (10 mM Tris-HCl [pH 7.5], 10 mM NaCl, 3 mM MgCl<sub>2</sub>) at 5 x 10<sup>6</sup> cells/ml and incubated for 10 min on ice. The swollen cells were broken in a tight-fitting Dounce homogenizer (10 strokes with a B pestle). Intact nuclei were precipitated through a layer of 0.25 M sucrose in TNM buffer by centrifugation at 1,300 x g for 10 min, then resuspended in digestion buffer (15 mM Tris-HCl [pH 7.5], 15 mM NaCl, 3 mM MgCl<sub>2</sub>, 60 mM KCl, 0.25 mM sucrose, 0.5 mM dithiothreitol, 1 mM phenylmethylsulfonyl fluoride) at 2 x 10<sup>7</sup> nuclei/ml. Nuclei were digested with various amounts of DNase I (0-20 U) at 37°C for 10 min. Samples were treated with proteinase K overnight at 50°C, followed by phenol:chloroform extraction and isopropanol precipitation. DNA pellets were dissolved in 10 mM Tris (pH 8.0), and the extent of DNase digestion was

determined by agarose gel electrophoresis. DNA was quantitated three independent times using PicoGreen dsDNA Quantitation Reagent (Invitrogen) and a fluorimeter (Molecular Devices).

Quantitative real-time PCR was used to identify valid DNase hypersensitive sites. Primer sets were designed to flank highly conserved sequences surrounding genes involved in adipocyte development. DHS originally identified from human CD4+ T cells, B cells, HeLa cells, and hepatocytes were mapped to the orthologous positions in the mouse genome (Crawford et al., 2006b). Primer sets designed around the orthologous DNase HS sites were shown to identify valid DNase HS sites in mouse CD4+ T cells, and were used as positive controls for this study (Crawford et al., 2006b). A negative control set of 96 primer sets were designed to flank random unique sequences in the mouse genome. Each primer set was used to amplify non-digested or DNase-digested nuclear DNA. A total of 9 ng of non-digested and DNase-digested DNA were pipetted into 384 well plates (Quadra 384, Tomtec), followed by the addition of primers and SYBR green PCR mix (Qiagen). All PCR reactions were performed in duplicate on a 7900 real-time PCR machine (Perkin Elmer) on two separate days. Dissociation curves were examined manually for each reaction, and any curve showing a reaction failure, multimers suggesting distinct amplification products, or any other form of aberrancy were discarded. Of 268 primer sets chosen to flank conserved islands, 38 resulted in failed reactions or aberrant dissociation curves in either Day 0 or Day 7 samples (14.1%). Fourteen of 96 (14.5%) random primers and 8 of 96 (8.3%) positive control regions were discarded for similar reasons. To determine which regions should be considered hypersensitive, we set a cut-off of a 5% false discovery rate (occurring at  $\Delta C_T=1.0$ , i.e., 95% of random amplicons have a  $\Delta C_T < 1.0$ ) for Day 7 samples. For Day 0 samples the threshold was also set to give a 5% false discovery rate, at  $\Delta C_T=0.2$ . A differentiation-dependent DHS was defined as a site that exceeded the hypersensitivity threshold set for Day 7, but not the threshold set for Day 0.

### Computational Analysis

The Discriminating Matrix Enumerator (DME) algorithm (Smith et al., 2005) was used for *de novo* motif discovery in the DHS. The DME algorithm enumerates motifs and chooses those that best distinguish between two sequence sets, referred to as foreground and background sets. In this case, the foreground set was composed of the sequences corresponding to the DHS and the background sets were obtained by randomly sampling in the regions surrounding the DHS.

The Matcompare (Schones et al., 2005) algorithm was used to annotate the discovered motifs. Motifs discovered with DME were compared to all vertebrate profiles in the TRANSFAC database (v9.3) (Matys et al., 2006) using the Kullback-Leibler divergence (KL div) as a scoring function. The TRANSFAC profile most similar to each DME profile and below a dissimilarity threshold (KL div  $\leq 1.5$ ) was chosen to annotate the DME profile and determine the likely transcription factor corresponding to the *de novo* discovered motif. The motifclass algorithm, which is part of the CREAD package (<http://rulai.cshl.edu/cread>), was used to measure how well each *de novo* discovered motif classified the foreground and background sequence sets.

For classification of the sequence sets, we define the sensitivity and specificity of a motif as

$$\text{Sensitivity} = \frac{n_{fg}}{N_{fg}} \quad \text{and} \quad \text{Specificity} = 1 - \frac{n_{bg}}{N_{bg}},$$

where  $N_{fg}$  ( $N_{bg}$ ) is the number of sequences composing the foreground (background) set and  $n_{fg}$  ( $n_{bg}$ ) is the number of sequences in the foreground (background) that contain the motif in

question. The statistic used to measure the ability of the motif to classify the sequence sets is the Error Rate (Smith et al., 2006), defined as

$$ErrorRate = 1 - \frac{Sensitivity + Specificity}{2}.$$

Putative IRF-REs were predicted using STORM (Schones et al., 2007). STORM scans through the input sequences with a position weight matrix (PWM) and reports sites scoring above a threshold. To obtain a scoring threshold for the IRF PWM, the following procedure was carried out. Promoter regions (-1000: +300 with respect to TSS) from human, mouse, rat, chicken and cattle were obtained from the Eukaryotic Promoter Database (EPD) (Perier et al., 2000) by selecting the 'Representative set of not closely related sequences' for each species. Each promoter in this set was scanned with the IRF PWM and the maximum score in each sequence was recorded. An extreme value distribution was fit to this set of scores and the score *S* corresponding to allowing 20% of the distribution to be greater than *S* was selected as a scoring threshold. This threshold was then used to scan the DHSS regions for putative IRF-REs.

### **Northern Blot Analyses**

Total RNA was isolated from murine tissues with Trizol<sup>®</sup> reagent (Invitrogen). For Northern blot analysis, 20 µg total RNA was subjected to 2.2 M formaldehyde 1% agarose gel electrophoresis and capillary transferred to Hybond XL nylon membranes (Amersham Biosciences). Membranes were hybridized with [ $\alpha$ -<sup>32</sup>P] dCTP-radiolabeled mouse IRFs cDNAs.

### **Protein Extraction and Western Blot Analysis**

Murine tissue lysates were prepared using RIPA buffer (Boston BioProducts) supplemented with Complete protease inhibitor cocktail (Roche). For Western blot analyses, 20 µg of protein of each sample was subjected to SDS-PAGE under reducing conditions, transferred, and blotted using the same anti-IRF4 antibody described above.

### **Supplemental References**

- Crawford, G.E., Holt, I.E., Whittle, J., Webb, B.D., Tai, D., Davis, S., Margulies, E.H., Chen, Y., Bernat, J.A., Ginsburg, D., et al. (2006b). Genome-wide mapping of DNase hypersensitive sites using massively parallel signature sequencing (MPSS). *Genome Res.* *16*, 123–131.
- Matys, V., Kel-Margoulis, O.V., Fricke, E., Liebich, I., Land, S., Barre-Dirrie, A., Reuter, I., Chekmenev, D., Krull, M., Hornischer, K., et al. (2006). TRANSFAC and its module TRANSCOMP: transcriptional gene regulation in eukaryotes. *Nucleic Acids Res.* *34*, D108–D110.
- Perier, R.C., Praz, V., Junier, T., Bonnard, C., and Bucher, P. (2000). The eukaryotic promoter database (EPD). *Nucleic Acids Res.* *28*, 302–303.
- Schones, D.E., Sumazin, P., and Zhang, M.Q. (2005). Similarity of position frequency matrices for transcription factor binding sites. *Bioinformatics* *21*, 307–313.
- Schones, D.E., Smith, A.D., and Zhang, M.Q. (2007). Statistical significance of cis-regulatory modules. *BMC Bioinformatics* *8*, 19.
- Smith, A.D., Sumazin, P., Xuan, Z., and Zhang, M.Q. (2006). DNA motifs in human and mouse proximal promoters predict tissue-specific expression. *Proc. Natl. Acad. Sci. USA* *103*, 6275–6280.

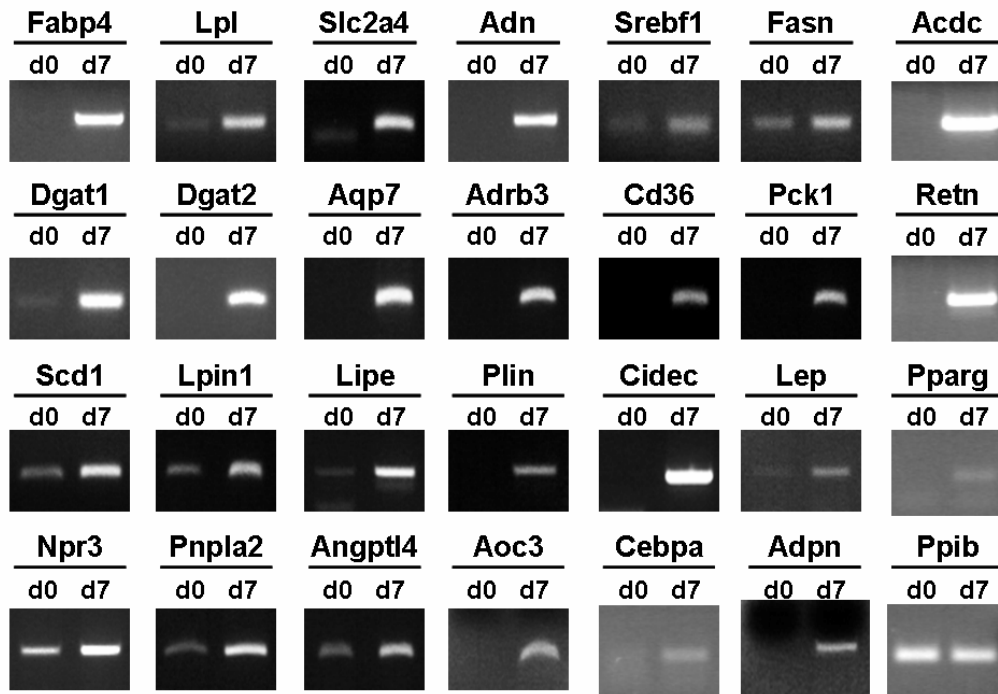

**Figure S1. Gene Expression of Adipose-Selective Genes during 3T3-L1 Adipogenesis**

All twenty-seven adipose-selective genes and the cyclophilin control (Ppib) were amplified from cDNA collected from 3T3-L1 pre-adipocytes (Day 0) and mature adipocytes (Day 7).

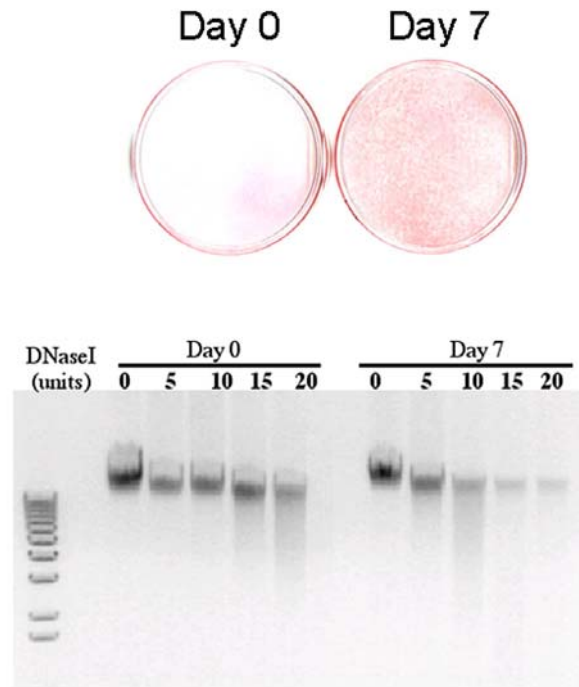

**Figure S2. Differentiation of 3T3-L1 and Agarose Gel Analysis of the Purified Genomic DNA**

Genomic DNA for DNase hypersensitivity analysis was harvested from 3T3-L1 pre-adipocytes and adipocytes. Oil red O staining shows excellent adipocyte conversion in harvested dishes (top). Nuclei from Day 0 and Day7 cells were treated with variable concentrations of DNase I as described in the methods. After proteinase K digestion and extraction, aliquots were run on agarose gels to determine the extent of digestion (bottom). We used 20U DNase from Day 0 and 10U DNase from Day 7 for subsequent experiments because of their similar degree of digestion.

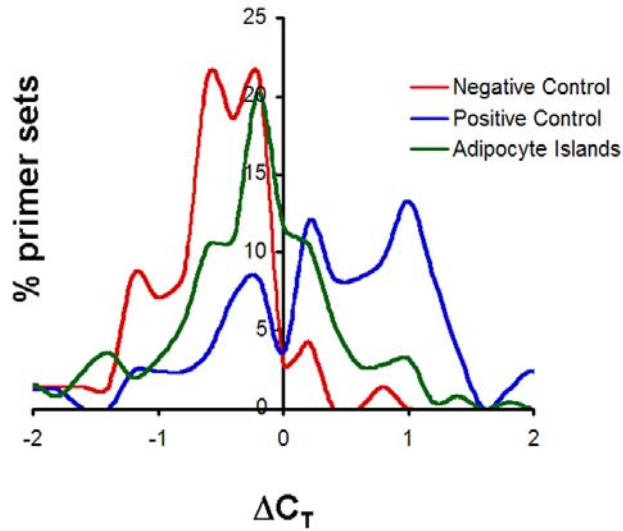

**Figure S3. Results of DNase Hypersensitivity Analysis of Day 0 Samples**

The X axis represents the difference in cycle threshold ( $\Delta C_T$ ) between DNase digested and undigested samples. The Y axis represents the percent of all primer sets that displayed any given  $\Delta C_T$ . The red line describes results for random primer pairs, which serve as a negative control. The blue line describes results for primer pairs that amplify regions known to be hypersensitive in other cell types. The green line describes results using primer pairs derived from the adipocyte selective gene set.

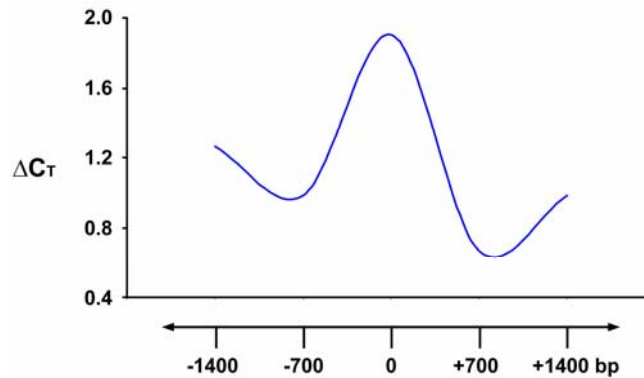

**Figure S4. qPCR Analysis of the FABP4 I4 DHS**

DNA from Day 7 adipocytes was subjected to qPCR with primers sets at increasing distance from the identified DHS. The difference between DNase-digested and undigested DNA ( $\Delta C_T$ ) is used as a measure of hypersensitivity at the amplified locus.

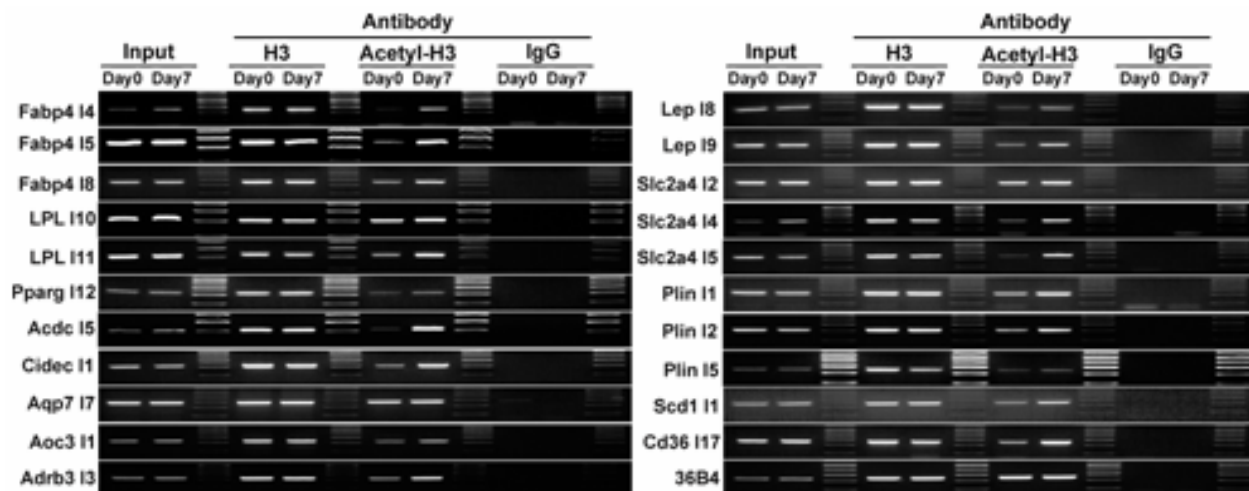

**Figure S5. Differentiation-Dependent DHS Show Hyperacetylation of Histone 3 (H3) during Adipogenesis**

The twenty-one differentiation-dependent DHS were studied using ChIP at Day 0 and Day 7. Fifteen of twenty-one differentiation-dependent DHS show enhanced acetyl-H3 at Day 7. The 36B4 promoter region was used as a positive control for the H3 acetylation.

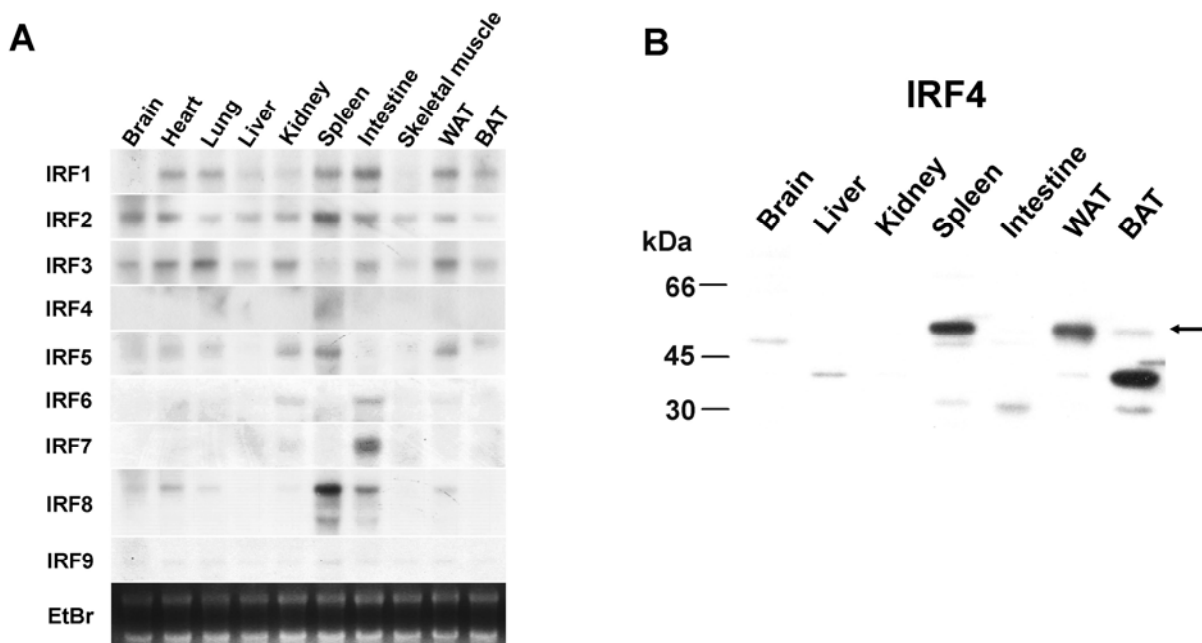

**Figure 6. IRFs Are Expressed in Adipose Tissue**

(A) Northern blots of murine tissues using probes specific for IRF1-9.  
 (B) Western blot analysis of IRF4 protein in various tissues.

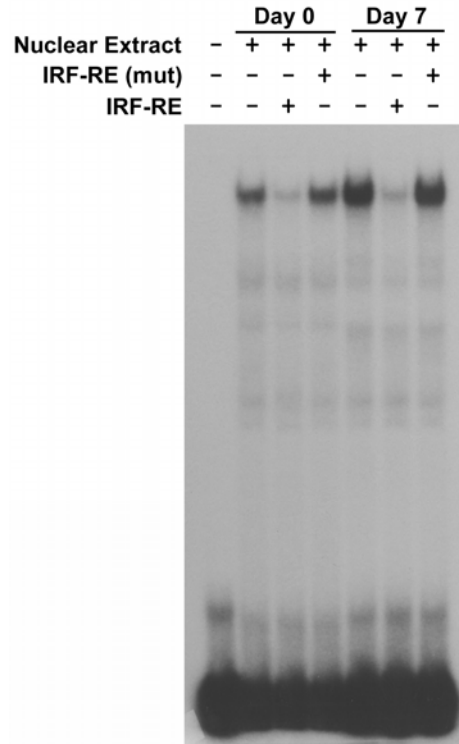

**Figure S7. EMSA Showing Binding of Factors in Day 0 and Day 7 Nuclear Extract to the Putative IRF-RE in Pparg I8**

The bound complex can be successfully competed (50X molar excess) with a consensus IRF-RE, but not with an IRF-RE that has key IRF recognition residues mutated (IRF-RE mut).



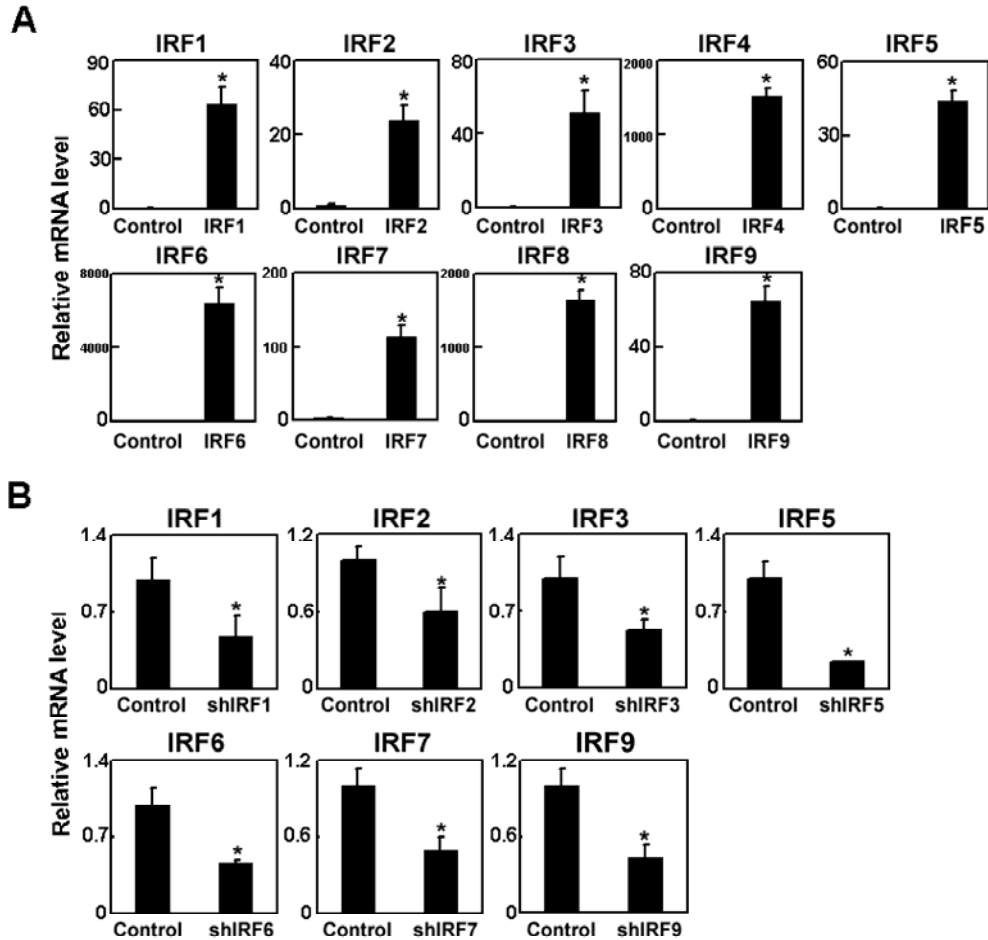

**Figure S8.**

(A) Level of IRF expression in virally transduced 3T3-L1 pre-adipocytes. Cells were transduced with retrovirus expressing an individual IRF isoform or control virus. Cells were selected, grown to confluence, and harvested for RNA and subsequent qPCR. Results reflect mean  $\pm$  SD,  $n = 3$ , normalized to 36B4. Endogenous levels in control virus-infected cells are arbitrarily given a value of 1. \* $p < 0.01$ .

(B) Efficacy of isoform-specific IRF knockdown in 3T3-L1 pre-adipocytes. Cells were transduced with a lentivirus expressing a specific IRF shRNA or control virus. Cells were selected, grown to confluence, and harvested for RNA and subsequent qPCR. Results reflect mean  $\pm$  SD,  $n = 3$ , normalized to 36B4. Endogenous levels in control virus-infected cells are arbitrarily given a value of 1. \* $p < 0.05$ .

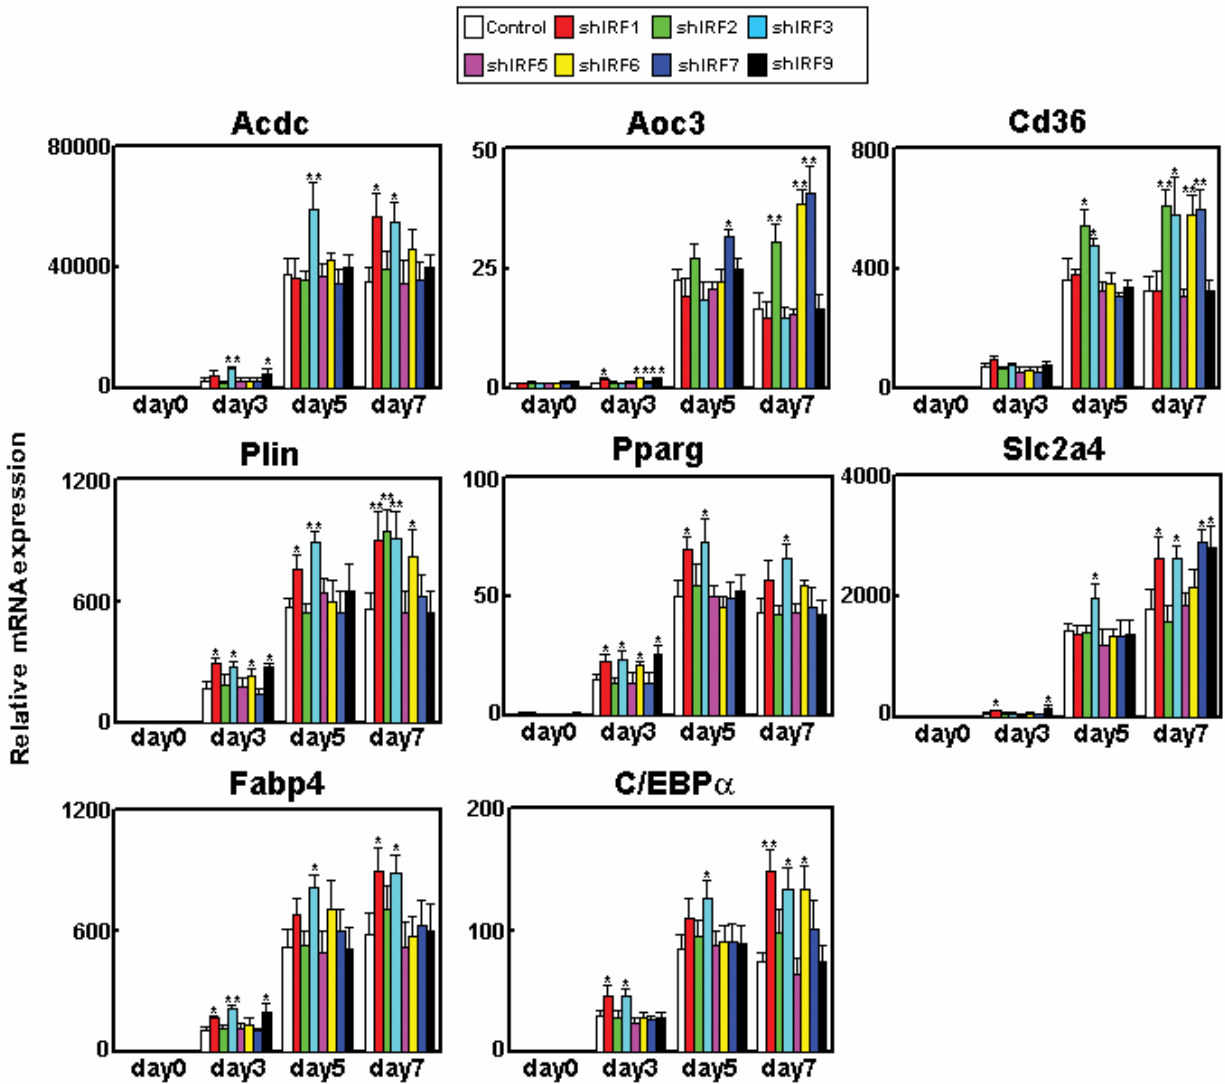

**Figure S9. Adipocyte Gene Expression in 3T3-L1 Cells Undergoing Differentiation in the Presence of Isoform-Specific shRNAs**

Cells from Figure S8B were differentiated with DMI, and RNA was harvested at Days 0, 3, 5, and 7 for qPCR. Mean  $\pm$  SD,  $n = 3$ , normalized to 36B4. Endogenous levels in control virus-infected cells at Day 0 are arbitrarily given a value of 1. \*\* $p < 0.01$ . \* $p < 0.05$ .

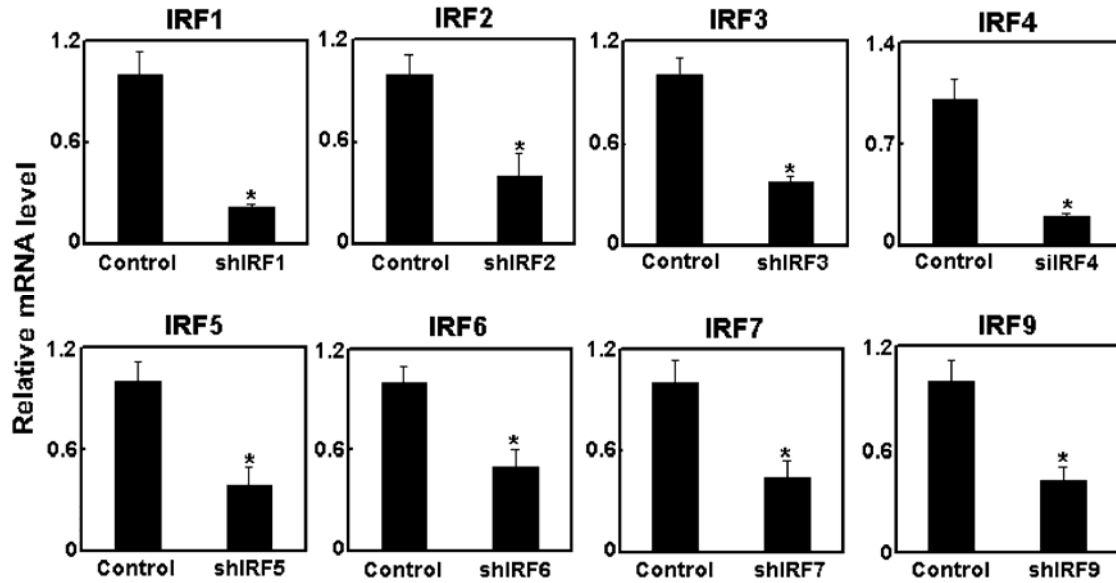

**Figure S10. Efficacy of Isoform-Specific IRF Knockdown in Mature 3T3-L1 Adipocytes**

Cells were transfected with a construct expressing a specific IRF shRNA or control vector. Forty-eight hours after transfection, cells were harvested for RNA and subsequent qPCR. Results reflect mean  $\pm$  SD, n = 3, normalized to 36B4. \*p < 0.05.

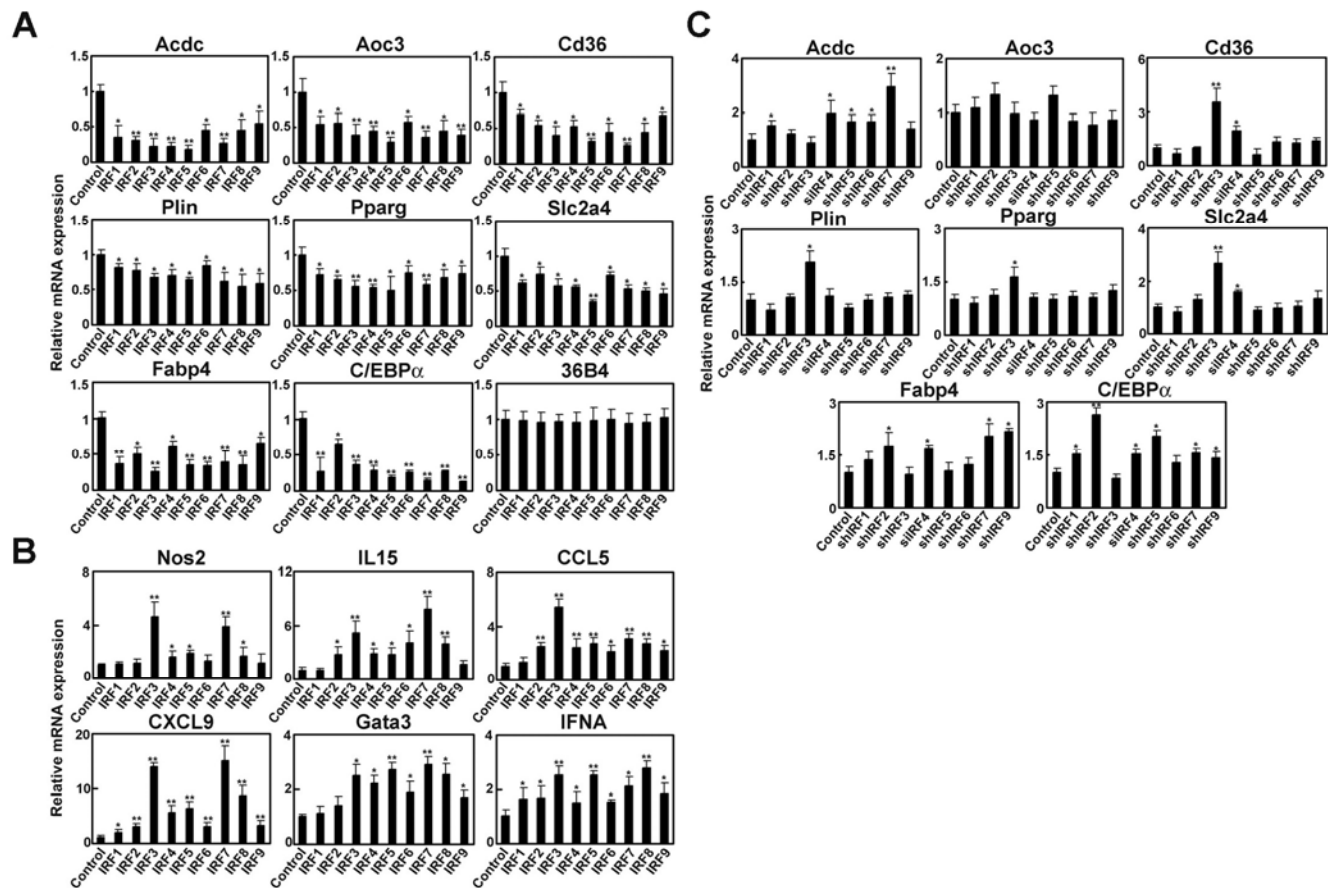

**Figure S11. IRFs Regulate Adipocyte Gene Expression in Mature Adipocytes**

(A and B) 3T3-L1 adipocytes were transfected with IRF expression plasmids or empty vector 5 days after the induction of differentiation. Total RNA was harvested 24 hours later for qPCR analysis. Data are expressed as fold induction relative to vector control. All samples are normalized to 36B4. Results are expressed as mean  $\pm$  SD,  $n = 3$ ,  $*p < 0.05$ ,  $**p < 0.01$  vs. vector control.

(C) 3T3-L1 adipocytes at Day 5 post-DMI were transfected with lentiviral plasmids expressing shRNAs directed against specific IRF isoforms, and total RNA was harvested 48 hours later. All samples are normalized to 36B4. Results are expressed as mean  $\pm$  SD,  $n = 3$ ,  $*p < 0.05$ ,  $**p < 0.01$  vs. vector control.

**Table S1. Adipose-Selective Genes**

| Gene           | TSS             | Islands |
|----------------|-----------------|---------|
| <i>Acdc</i>    | chr16:22990606  | 6       |
| <i>Adn</i>     | chr10:79787454  | 2       |
| <i>Adpn</i>    | chr15:84523445  | 3       |
| <i>Adrb3</i>   | chr8:26016986   | 6       |
| <i>Angptl4</i> | chr17:32273399  | 6       |
| <i>Aoc3</i>    | chr11:101001729 | 4       |
| <i>Aqp7</i>    | chr4:41139373   | 15      |
| <i>Cd36</i>    | chr5:16198925   | 19      |
| <i>Cebpa</i>   | chr7:23536949   | 3       |
| <i>Cidec</i>   | chr6:113956001  | 3       |
| <i>Dgat1</i>   | chr15:76837471  | 7       |
| <i>Dgat2</i>   | chr7:86456164   | 15      |
| <i>Fabp4</i>   | chr3:10267743   | 17      |
| <i>Fasn</i>    | chr11:120495193 | 5       |
| <i>Lep</i>     | chr6:28912409   | 29      |
| <i>Lipe</i>    | chr7:14131862   | 7       |
| <i>Lpin1</i>   | chr12:16720814  | 6       |
| <i>Lpl</i>     | chr8:67906773   | 15      |
| <i>Npr3</i>    | chr15:11815300  | 22      |
| <i>Pck1</i>    | chr2:173216504  | 14      |
| <i>Plin</i>    | chr7:66811682   | 10      |
| <i>Pnpla2</i>  | chr7:129146181  | 3       |
| <i>Pparg</i>   | chr6:115748914  | 20      |
| <i>Retn</i>    | chr8:3618201    | 2       |
| <i>Scd1</i>    | chr19:43744211  | 13      |
| <i>Slc2a4</i>  | chr11:69560690  | 6       |
| <i>Srebf1</i>  | chr11:59833144  | 10      |

The twenty-seven murine adipose-selective genes chosen for this study are listed here, along with the number of conserved “islands” that were studied for each gene. Islands were at least 70 bp in length and 70% conserved, and were present in the proximal 50 kb upstream of the TSS or the first (or largest) intron. For *Pparg*, we used the more adipose-selective PPAR $\gamma$ 2 promoter to define the TSS.

**Table S2. Differentiation-dependent DHS**

| DHS              | $\Delta C_T$ (D0) | $\Delta C_T$ (D7) | $\Delta \Delta C_T$ | Distance from TSS (kb) |
|------------------|-------------------|-------------------|---------------------|------------------------|
| <i>Cd36 I3</i>   | -1.85             | 1.66              | 3.51                | -14.2                  |
| <i>Pparg I8</i>  | -1.11             | 1.97              | 3.08                | -10.5                  |
| <i>Fabp4 I4</i>  | -1.65             | 1.26              | 2.91                | -0.3                   |
| <i>Plin I4</i>   | -1.41             | 1.39              | 2.80                | -2.6                   |
| <i>Adrb3 I3</i>  | -2.04             | 0.67              | 2.71                | -1.5                   |
| <i>Fabp4 I8</i>  | -1.43             | 1.06              | 2.49                | -5.5                   |
| <i>Pparg I9</i>  | -1.77             | 0.67              | 2.44                | -10.0                  |
| <i>Cd36 I7</i>   | -1.74             | 0.59              | 2.33                | -11.4                  |
| <i>Fabp4 I5</i>  | -1.63             | 0.53              | 2.16                | -0.6                   |
| <i>Lpl I10</i>   | -1.68             | 0.40              | 2.08                | +0.2                   |
| <i>Pparg I12</i> | -1.26             | 0.78              | 2.04                | -1.0                   |
| <i>Aoc3 I1</i>   | -1.69             | 0.28              | 1.97                | +2.2                   |
| <i>Plin I5</i>   | -1.48             | 0.47              | 1.95                | -2.8                   |
| <i>Acdc I6</i>   | -1.55             | 0.29              | 1.84                | -0.1                   |
| <i>Lep I9</i>    | -1.03             | 0.68              | 1.71                | -28.4                  |
| <i>Plin I2</i>   | -1.12             | 0.47              | 1.59                | -0.8                   |
| <i>Acdc I5</i>   | -1.20             | 0.21              | 1.41                | -0.4                   |
| <i>Slc2a4 I4</i> | -1.31             | 0.09              | 1.40                | -0.2                   |
| <i>Cd36 I17</i>  | -1.12             | 0.24              | 1.36                | +3.2                   |
| <i>Npr3 I5</i>   | -1.01             | 0.35              | 1.36                | -8.8                   |
| <i>Lep I8</i>    | -1.31             | 0.01              | 1.32                | -29.0                  |
| <i>Aqp7 I2</i>   | -1.26             | 0.02              | 1.28                | -2.8                   |
| <i>Cd36 I15</i>  | -1.16             | 0.10              | 1.26                | -0.6                   |
| <i>Lpl I11</i>   | -1.01             | 0.23              | 1.24                | +1.3                   |
| <i>Slc2a4 I5</i> | -1.00             | 0.24              | 1.24                | +0.7                   |
| <i>Scd1 I1</i>   | -1.02             | 0.22              | 1.24                | -39.1                  |
| <i>Cidec I1</i>  | -1.14             | 0.07              | 1.21                | +1.0                   |
| <i>Plin I1</i>   | -1.08             | 0.13              | 1.21                | -0.1                   |
| <i>Cd36 I13</i>  | -1.20             | 0.01              | 1.21                | -4.2                   |
| <i>Scd1 I6</i>   | -1.12             | 0.05              | 1.17                | -14.9                  |
| <i>Aqp7 I7</i>   | -1.04             | 0.13              | 1.17                | -28.1                  |
| <i>Slc2a4 I2</i> | -1.06             | 0.10              | 1.16                | -0.8                   |

Differentiation-dependent DHS in 3T3-L1 cells. For each DHS, the difference between DNase treated and untreated amplification ( $\Delta C_T$ ) is given for template collected from pre-adipocytes (D0) and mature adipocytes (D7). The DHS are ranked by the  $\Delta \Delta C_T$ , which is the difference between the  $\Delta C_T$  at Day 0 and at Day 7, and thus provides a measure of the differentiation dependence of the hypersensitivity. Also given is the distance of the DHS from the TSS. A negative number means that the DHS is in the 5' flanking region while a positive number means that the DHS is intronic.

**Table S3. IRF Binding Motifs Identified in Differentiation-Dependent DHS**

| DHS              | Motif        | Location        | Strand |
|------------------|--------------|-----------------|--------|
| <i>Slc2a4 I2</i> | CCTTTCTTTCCA | chr11:69561327  | +      |
| <i>Cd36 I3</i>   | CTTTCCTTTCCT | chr5:16213127   | -      |
| <i>Cd36 I3</i>   | CTTTCCTTTCCT | chr5:16213132   | -      |
| <i>Cd36 I3</i>   | CTTTCCTTTCCT | chr5:16213137   | -      |
| <i>Pparg I9</i>  | CCTCCCTTTCCT | chr6:115800123  | -      |
| <i>Plin I4</i>   | CCTCCCTTTCCT | chr7:66814192   | -      |
| <i>Acdc I5</i>   | CCTCCCTTTCCT | chr16:22990252  | -      |
| <i>Pparg I8</i>  | CTTCTCATTCA  | chr6:115799789  | +      |
| <i>Aoc I1</i>    | CCCTCCTTTCCT | chr11:101003735 | -      |

Nine potential IRF binding sites were identified by STORM in the adipocyte DHS. Note that three of these sites are within a single DHS (*Cd36 I3*).

**Table S4. PCR Primers Used to Amplify Genes of Interest in This Study**

| Gene    | Primer  | Sequence               |
|---------|---------|------------------------|
| Acdc    | Forward | GTTGCAAGCTCTCCTGTTCC   |
|         | Reverse | GCTTCTCCAGGCTCTCCTTT   |
| Adn     | Forward | CCTTGCAATACGAGGACAAAGA |
|         | Reverse | CACACCCCAACCAGCCAC     |
| Adpn    | Forward | ACGGAGGAGTGAGCGACAAC   |
|         | Reverse | CGCCACCAAGGACAGACTCA   |
| Adrb3   | Forward | ATTGGCGCTGACTGGCCATT   |
|         | Reverse | CCTCGGCATCTGCCCCTACA   |
| Angptl4 | Forward | ACAGCATCACAGGGAACCGA   |
|         | Reverse | CCCACGGAGGTCATGGTCTT   |
| Aoc3    | Forward | TACATGCGGGATGTGACTGT   |
|         | Reverse | CAGGTTCTGTCCCTGGTGTT   |
| Aqp7    | Forward | TGTCGCTAGGCATGAACTCC   |
|         | Reverse | ACCTTCTGGTCTCTTGCTGT   |
| Cd36    | Forward | TCTGTTGGAACAGAGGATGA   |
|         | Reverse | TGGAACCAAACCTGAGGAATG  |
| Cebpa   | Forward | TGTGCGAGCACGAGACGTC    |
|         | Reverse | AACTCGTCGTTGAAGGCGG    |
| Cidec   | Forward | GATCGATGTGGCCCGGGTAA   |
|         | Reverse | TAGCTGGAGGTGCCAAGCAG   |
| Dgat1   | Forward | GGAGACCGCGAGTTCTACAG   |
|         | Reverse | CTCATGGAAGAAGGCTGAGG   |
| Dgat2   | Forward | TCTCAGCCCTCCAAGACATC   |
|         | Reverse | GCCAGCCAGGTGAAGTAGAG   |
| Fabp4   | Forward | TTCGATGAAATCACCGCAGA   |
|         | Reverse | AGGGCCCCGCCATCT        |
| Fasn    | Forward | TTGCTGGCACTACAGAATGC   |
|         | Reverse | AACAGCCTCAGAGCGACAAT   |
| Lep     | Forward | CTGGAGAATCTCCGAGACCT   |
|         | Reverse | TCAGGGCTAACATCCAACCTG  |
| Lipe    | Forward | CCGCTGACTTCCTGCAAGAG   |
|         | Reverse | CTGGGTCTATGGCGAATCGG   |
| Lpin1   | Forward | AGCTCAAGGCCCATATCCC    |
|         | Reverse | GGTGACTGGTTGGCTGACCT   |
| Lpl     | Forward | GCCAGCAACATTATCCAGT    |
|         | Reverse | GGTCAGACTTCCTGCTACGC   |
| Npr3    | Forward | CTGGTCTACAGCGACGACAA   |
|         | Reverse | CACCGCCAACATGATTCTCC   |
| Pck1    | Forward | ACGACCCCTTTGCCATGCGA   |
|         | Reverse | TAGCCGATGGGCGTGAGCTT   |
| Plin    | Forward | GATCGCCTCTGAACTGAAGG   |
|         | Reverse | CTTCTCGATGCTTCCCAGAG   |
| Pnpla2  | Forward | GGTGACCATCTGCCTTCCAG   |
|         | Reverse | TGCAGAAGAGACCCAGCAGT   |



|        |         |                          |
|--------|---------|--------------------------|
| Pparg  | Forward | GCATGGTGCCTTCGCTGA       |
|        | Reverse | TGGCATCTCTGTGTCAACCATG   |
| Ppib   | Forward | GGTGGAGAGCACCAAGACAG     |
|        | Reverse | GCCGGAAGTCGACAATGATG     |
| Retn   | Forward | TCATTTCCCCTCCTTTTCCT     |
|        | Reverse | GGGCTGCTGTCCAGTCTATC     |
| Scd1   | Forward | CGCCCAAGCTGGAGTACGTC     |
|        | Reverse | GGGCCCATTCGTACACGTCA     |
| Slc2a4 | Forward | GATTCTGCTGCCCTTCTGTC     |
|        | Reverse | ATTGGACGCTCTCTCTCAA      |
| Srebfl | Forward | GCAGACCCTGGTGAAGTGG      |
|        | Reverse | GTCGGTGGATGGGCAGTTT      |
| Irf1   | Forward | GCAAAACCAAGAGGAAGCTG     |
|        | Reverse | CAGAGAGACTGCTGCTGACG     |
| Irf2   | Forward | GTCACTAACCCGCCAGACAT     |
|        | Reverse | GCTCCTCTTCCCTCCAGTGTG    |
| Irf3   | Forward | GGCTTGTGATGGTCAAGGTT     |
|        | Reverse | CATGTCCTCCACCAAGTCCT     |
| Irf4   | Forward | GCAGCTCACTTTGGATGACA     |
|        | Reverse | CAAACGTCACAGGACATTG      |
| Irf5   | Forward | CAGGTGAACAGCTGCCAGTA     |
|        | Reverse | CTCATCCACCCCTTCAGTGT     |
| Irf6   | Forward | AGTGTGGCCCAAACAGAAC      |
|        | Reverse | GGGTTGCTCACCGTCATAGT     |
| Irf7   | Forward | CCAGTTGATCCGCATAAGGT     |
|        | Reverse | GAGCCCAGCATTTTCTCTTG     |
| Irf8   | Forward | GATCGAACAGATCGACAGCA     |
|        | Reverse | GCTGGTTCAGCTTTGTCTCC     |
| Irf9   | Forward | GTCTGGAAGACTCGCCTACG     |
|        | Reverse | TGGTCCTCCCATTTTCCATA     |
| 36B4   | Forward | GAGGAATCAGATGAGGATATGGGA |
|        | Reverse | AAGCAGGCTGACTTGGTTGC     |
| Ccl5   | Forward | CCCTCACCATCATCCTCACT     |
|        | Reverse | CCTTCGAGTGACAAACACGA     |
| Cxcl9  | Forward | ACCAACAAGCACCCCTGAATC    |
|        | Reverse | AAGGCGTGATGAATTTTG       |
| Gata3  | Forward | GTCATCCCTGAGCCACATCT     |
|        | Reverse | GTAGAAGGGGTCGGAGGAAC     |
| Ifna   | Forward | TCTGATGCAGCAGGTGGG       |
|        | Reverse | AGGGCTCTCCAGACTTCTGCTCTG |
| Il15   | Forward | TTGCAGTGCATCTCCTTACG     |
|        | Reverse | GTGCTTTTGAAGAGCCAGAGG    |
| Nos2   | Forward | CCTGTGTTCCACCAGGAGAT     |
|        | Reverse | CCCTGGCTAGTGCTTCAGAC     |

**Table S5. PCR Primers Used to Amplify Genomic Islands in Hypersensitivity Studies**

| Island             | Left Primer             | Right Primer           |
|--------------------|-------------------------|------------------------|
| <i>Acdc 11</i>     | ACACACAGGACAGAATGTGGAC  | ATTATGCCAATAATCCCCACAG |
| <i>Acdc 12</i>     | TCGCTAAGCAAGTGTGTGTTTT  | CCCATATAGGAACACTGCTGGT |
| <i>Acdc 13</i>     | AAGCATGACTCTTAGGCTCTGTG | GGCGGACTCACATCTTATTTTT |
| <i>Acdc 14</i>     | GTGAGTGGTGACTGCTAGTTGC  | GCCCAGTGTCACAGAACACTTA |
| <i>Acdc 15</i>     | CTGAACCACACAGCTTCACATT  | CTCTACCAGAGCAAGAGATGGG |
| <i>Acdc 16</i>     | TGGATTAACCAGGTTCCCTAA   | GCCAGCCGAGAATATAGAATTG |
| <i>Adn 11</i>      | GAAGGCAGAATTCACAGGAAAT  | CATGTGTCTGTCATGGTGTCTG |
| <i>Adn 12</i>      | G TTCACATCATCTGTCCAGAA  | GTCCACTCACCACATACAGCC  |
| <i>Adpn 11</i>     | CAGGAAGTCCATAATAGGGTGC  | GGTGAGTGTAATTGGGAATCGT |
| <i>Adpn 12</i>     | CTGGGGCCTCTTTAACACTTTA  | CACTCTCACTGCCCTTTACTCC |
| <i>Adpn 13</i>     | ATCAAAGACCATTGGGAAACAG  | TAATTTTGTGCCCTCTCTGTGA |
| <i>Adrb3 11</i>    | AGAGAGCCGTTTCTGTGAGG    | CTCTTGTGACTATTGGACGCTG |
| <i>Adrb3 12</i>    | TGTCAAGACTGCTCCATGAGTT  | TTAGGTTCTCTCTTCCCCTTCC |
| <i>Adrb3 13</i>    | CTTCTTGCTGGTCATCAGGGT   | TTGAGTATGTCTTGGGGGAGAT |
| <i>Adrb3 14</i>    | CCTCACTATCACTTTTGGTGGC  | CCCACTCACTATGATTGCCTC  |
| <i>Adrb3 15</i>    | AAACTGTGCCAGCAATACCTCT  | TTGTCCCAACCTATCCCTTAGA |
| <i>Adrb3 16 P1</i> | CCATAGTCACAATCACAGCCAT  | CACAGCTACGGAGAGATGAGTG |
| <i>Adrb3 16 P2</i> | CGTATAGAAGCAGGAGGAGGTC  | GAGTAGAGCCAGGCAGTGACTT |
| <i>Adrb3 16 P3</i> | TCTCACCCTCATCTCTCCGTA   | ACATTTGTTTGCAGAGTTTCCC |
| <i>Angptl4 11</i>  | CTCAGATTCTACTGTAGGCCCG  | GCGTGGTTGACTTTACCTGAAT |
| <i>Angptl4 12</i>  | CCTGTCTGACAAGAAGACCCTT  | CCTACTCTTCTGTCTGCCTGT  |
| <i>Angptl4 13</i>  | AGGCAGAGACAAAAGAGGACTG  | GTTTCAGATTCCAGAGGTTTGC |
| <i>Angptl4 14</i>  | GGATCATAAGTGAAGAGGGTGC  | AAAGAGGCTTCCCAAGATGAC  |
| <i>Angptl4 15</i>  | ACATCACCCATCCAGAACCTAT  | ATTCGTTACCCCTTCTTGACAT |
| <i>Angptl4 16</i>  | TAGCTCCCTTTCCCCTACTTTC  | ATAGGTTCTGGATGGGTGATGT |
| <i>Aoc3 11</i>     | AGGTTGCTACCAAACAAAGAT   | TTGAACGGAGGCCTACATAAAC |
| <i>Aoc3 12</i>     | AGCCCATGGCATCTCTTTTT    | CAAACCTTCTGAGTCTGCCT   |
| <i>Aoc3 13 P1</i>  | GCAAGGCAGGACTCAGAAAGT   | GAGAGGGAGAACCTGACATCC  |
| <i>Aoc3 13 P2</i>  | TGTGAGAAGCTGCAGGACC     | CTCTTCCATGACATACAGTGGC |
| <i>Aoc3 13</i>     | TCCATGGAAGAGCCAGTTTT    | CAAGGAGCCTAGCACTCTCATC |
| <i>Aoc3 14</i>     | TGTCTTCCCTTAAGGTCACCAG  | CTCAGGCTCTCATAGGCACAG  |
| <i>Aqp7 11</i>     | AAAGAACATTAAGAAGGCACCG  | GGTACCCAGCTATTCTCTCCT  |
| <i>Aqp7 110</i>    | TTTCAACATCGCAACTGTTTTT  | TAGAAGAGAGCCTTGGTGGAAC |
| <i>Aqp7 111</i>    | GTTCCACCAAGGCTCTTCTTA   | TCAACACCTGTGGGATGAATAG |
| <i>Aqp7 112</i>    | CTCTTTACCCCTTGCTCTGAAA  | CATAGGAGCTGGCTTTGATTCT |
| <i>Aqp7 113</i>    | CCACAGCTTGCTCATAGATTCA  | CTTCTTACTGCTCAGAGCCAC  |
| <i>Aqp7 114</i>    | AGCGTTTCTATACTGGGTGGAG  | AAGTAACACCAGCCAACCATCT |
| <i>Aqp7 115</i>    | CTGCTTGGTACACTGAAGGAAA  | AAGTTCAGGCCACAGAACTAGG |
| <i>Aqp7 12</i>     | TGCAACTGAACTGTAGCTCTGC  | GACTATGAGGCCCAGAATTCAC |
| <i>Aqp7 13</i>     | TTACTTCTATATCCCCGAGGC   | ATCTTGTCAGCTCTCCAGGTA  |
| <i>Aqp7 14</i>     | CACACACACACACACACACT    | AGGCTGAACAGGGAGTGAAGT  |
| <i>Aqp7 15</i>     | AACACTTCTCTTCACCTCCTGG  | TCAGCGTCTATGCTGAGAAATG |
| <i>Aqp7 16</i>     | GAGGGAGGGACAGAACCTAGTC  | TCTGTTGAACTGTGCGTTTAGC |

|                  |                           |                             |
|------------------|---------------------------|-----------------------------|
| <i>Aqp7 I7</i>   | TCCCTATGACTAGCATGCACAC    | CTTCAGGGTCCTTCACAAAAC       |
| <i>Aqp7 I8</i>   | GGTAATGAGGGACAGACTCCTG    | ACGGAACACTTTCCGTGATGT       |
| <i>Aqp7 I9</i>   | GGGGAACATAAGACTGTCATGG    | TAAGGGAGGTGGGTAGAGTGAA      |
| <i>Cd36 I1</i>   | CATGGAAAATAACCACTCAGCA    | TAAACTCTTTGCACTGGAGGGT      |
| <i>Cd36 I10</i>  | TTTGTGGTGCTCCTTAACACTG    | TACTTCCATCCTCTTTCCTCCA      |
| <i>Cd36 I11</i>  | TTGTAAAGCCAGGGGAGACATA    | GTTTATTTCACTGTAAGGCGGG      |
| <i>Cd36 I12</i>  | GTGCACATTATAAAGAATGAACAGG | TATAATTTCCCATGTAATACACACTTG |
| <i>Cd36 I13</i>  | ATTATACCCTTTACCCCGCAGT    | ATCATGTGCTGTGTCAGATCCT      |
| <i>Cd36 I14</i>  | GCCATCTAGAGCTAGGTTTCCA    | TGGCATGTACAGTGGAAGATGT      |
| <i>Cd36 I15</i>  | GTCCCAACAAAGCCTGAAAAT     | GCATATCACCATCCTCTTGAAA      |
| <i>Cd36 I16</i>  | GCTCACAAGGGTCTATTTCTGG    | CACTCCAGCATCTGGAATAACA      |
| <i>Cd36 I17</i>  | GATTGGGCAAAGTCTGAGGTAG    | GGAGGAAAAGAGAATCCATGTG      |
| <i>Cd36 I18</i>  | TGGCCATCCATACTTATCTTCA    | GTCCAAACAGTTCTCTGGTCCT      |
| <i>Cd36 I19</i>  | CCAAGAAATCAATCACAGGACA    | TTCCACTCTGTCAAATATCAGCA     |
| <i>Cd36 I2</i>   | ATGATGCATGTCCTTCCCTAAT    | GGATAAAAGCCTCAGAACCAGA      |
| <i>Cd36 I3</i>   | TGCAGTTGCAAGGTTACAGAGT    | TCCTTTCCTTTCCTTTCCTTTC      |
| <i>Cd36 I4</i>   | ATTTGCAAGCACAAGTCTGGAT    | TAAGTGGTGAGCAGCAGTGATT      |
| <i>Cd36 I5</i>   | TGAATGTTTACAGTGCTAAGTGCAT | TCACAATCTCAGGTAATTTCTACTTCA |
| <i>Cd36 I6</i>   | CATACCATTTATTCTGGTTGCAT   | GTCCTAGAGCAGTCTGTGGAGC      |
| <i>Cd36 I7</i>   | TAAATGATAATGCCCAGGAGGA    | GTGGTCTTTTGTGGCTAGCTCT      |
| <i>Cd36 I8</i>   | AAAGTTCTGTGTGTGCCCTTCT    | TATTGCTGTTCTTTCCTCCTGG      |
| <i>Cd36 I9</i>   | GTCCTAGATTTTTGGCCTTCT     | TAAAGGAGTCAAGGACCACAGG      |
| <i>Cebpa I1</i>  | GATGCCCCGACCCTCTATAAAA    | CTCTGGAGGTGACTGCTCATC       |
| <i>Cebpa I2</i>  | GGAGACGCAATGAAAAAGAAAG    | TTGTGCGTCTTTTTCTCTGAAC      |
| <i>Cebpa I3</i>  | TGCTCACACCAGGTTGTTTATT    | AAACTGTTAGGGAGGTCTGCTG      |
| <i>Cidec I1</i>  | AGCCTCACTCACTCCATTGTTT    | CCCGTGGAGTTTCTGGACTAT       |
| <i>Cidec I2</i>  | GGCTTCCCTCCATTTTATTTCT    | ACTCAGACCATAAGCCACATCC      |
| <i>Cidec I3</i>  | GTTAATTCCGCAATCGCTCTAC    | CATTGTACAGAACTAAGGCCCC      |
| <i>Dgat1 I1</i>  | TCACTCACACCAACTATGGCTC    | AAAAGGGCTTCAGTAGGATGGT      |
| <i>Dgat1 I2</i>  | GAAGAAAGGTCAAAGAGGGCTGA   | AACTCTGTAGAGCAGGCTGACC      |
| <i>Dgat1 I3</i>  | ACCAAAGCCATTTACAAGACT     | GGCCTACATAGGTCATGTCTCC      |
| <i>Dgat1 I4</i>  | CCATTCAGTAGACAAAACGCAC    | GTAGCTCAGCCTATTGCAGCTC      |
| <i>Dgat1 I5</i>  | GCACACACACAACATCTTTTCA    | GTGGCAAAGTCTGGTTCTCTTT      |
| <i>Dgat1 I7</i>  | CAAGGCCTGTTCTTCTTCACTT    | CCTTCCTAAGCACAATAGCACC      |
| <i>Dgat2 I1</i>  | AGCTGGGAGAGGAAGGTAAAAC    | ATAGCACACAGAGAGCATTGG       |
| <i>Dgat2 I10</i> | ACCTAGCCATTCAGCTGCTAAC    | ATCTAAGGAGACTGGGATGCTG      |
| <i>Dgat2 I11</i> | ACAGTGATGCAATGGTCTTTGA    | GTCAAGAGCATGTGAGGTGGT       |
| <i>Dgat2 I12</i> | GCCACTGGACTGAAACCTTATC    | CCTCTAGAGCTGATGGTTCCAC      |
| <i>Dgat2 I13</i> | AAATCTAGAAAGCAGAGGCACC    | TCAAAGACCATTGCATCACTGT      |
| <i>Dgat2 I14</i> | TGGAGTGGTGTTTAAGCAAAGA    | GTCATTTGTCTTCCCTAGTGCC      |
| <i>Dgat2 I15</i> | GCTAAGAGCAAGCTGTGGATTT    | GGAAAGAAGGCTGTCCAGAGTA      |
| <i>Dgat2 I2</i>  | GGATTTGGGGATTTTTACAACA    | ACAAGAACTTCTGGTCCCAAG       |
| <i>Dgat2 I3</i>  | CTGTGCTGCTGCTCTTGTCTA     | TAGAAGGGCAGATGAAAACCTGG     |
| <i>Dgat2 I4</i>  | AGGGTGTACCATTATGCAAGG     | ACCACTGGTCTCATCTTGGT        |
| <i>Dgat2 I5</i>  | GAGCAGAAAAGAAAGGAGGTGA    | GGACTACCACAGAGCATCATCA      |

|                    |                            |                         |
|--------------------|----------------------------|-------------------------|
| <i>Dgat2 I6</i>    | ATTTAAAAGCATTGACATGGGC     | CTCCATCAGAGTGTTTCCACCT  |
| <i>Dgat2 I7</i>    | CTGAGGAGACAACTAGGCCAC      | TACCTCATAGACTGCAACCAGG  |
| <i>Dgat2 I8</i>    | GTACTATGAAGGTTGGGCCAGA     | GGCTTTTCCCCTTTTGAGTC    |
| <i>Dgat2 I9</i>    | TACAAGTGACATGAGACCCCGAG    | CTCGTTTCGTACCCTCTGTCATT |
| <i>Fabp4 I1</i>    | ATTGAGGCAGTTTGACCATTTT     | CAGACAATTCATTTTCATGAGGG |
| <i>Fabp4 I10</i>   | AGCTCCTGCTCTTTTCCCTACT     | AACTGAGGGGTGTCTCACTGAC  |
| <i>Fabp4 I11</i>   | CTGACACTCCTACTGGAGAGGG     | ACTATTGCTGATGCCATGTTGT  |
| <i>Fabp4 I12</i>   | GGGCTGGAGGCTTACTTAGATT     | ATGAGAGGGACCATCTTTCATC  |
| <i>Fabp4 I13</i>   | TTATGCAGAGAACCCTCCTGACA    | GATTGATCAACCTTTAGCACCC  |
| <i>Fabp4 I14</i>   | TACTTCTAAAACGTGTGGCCCT     | AAGATCATGGGAGACCACTGAC  |
| <i>Fabp4 I15</i>   | ACGGAGCTGTTTCTATCCATA      | ACGCTTTAGAAAAACAAGCTGC  |
| <i>Fabp4 I16</i>   | TGTGAGAACCGATGAGAAGAGA     | ATCTTCACACTTCCAAGGCAAT  |
| <i>Fabp4 I17</i>   | TTCTCCTCCTTGGAAATTTATTGA   | TCCTTAGAAACCCCTGAAAGTG  |
| <i>Fabp4 I2</i>    | CCCTGCTTTCCTTCTGAATTAC     | ACTGAAGTCATGATATTGCCCC  |
| <i>Fabp4 I3</i>    | TTTTAAGTAAAAGTTGCCCCCA     | ACCCGCAAGAAAGAGTCTACAG  |
| <i>Fabp4 I4 P1</i> | TTTTGTAAACCTTCGAGGAGGA     | TAAGTCCAGTGATCATTGCCAG  |
| <i>Fabp4 I4 P2</i> | CACTTTTAAAGATGCCCTGACC     | AATCCATAAGGAATAATGGGGG  |
| <i>Fabp4 I4 P3</i> | TGTTTTCCTCTGAGTCATGTTTTT   | AAGAAGGTCAAATGTGTCCAAGA |
| <i>Fabp4 I5</i>    | TGCAATAATGTGTTTAGTTCTTCTGA | AAACCAAACAAAGCCAAACAAC  |
| <i>Fabp4 I6</i>    | GGCTGAGGTCACATCTCAGAAT     | CTAGAGTGGGGTCTGTTTCCTC  |
| <i>Fabp4 I7</i>    | GACTGAGAGTGCTTTGAAGGCT     | GCTTCCACTTAATTCCTGATGG  |
| <i>Fabp4 I8</i>    | GATTGTTACAAGGCAAGGAAGG     | GAATCAGGTAGCTGGAGAATCG  |
| <i>Fabp4 I9</i>    | TGTGTGCTAAGAGCTAGGCATC     | CACAGTAAGGCAATACAGTGGG  |
| <i>Fasn I1</i>     | GAGGCCATAGGAAAGACAGAGA     | CTGCCCAGGCTCTATCAAAG    |
| <i>Fasn I2</i>     | ACATTGGGGAGTGAGGAAACTA     | AAAGGAAAAGGAGATGCAACAA  |
| <i>Fasn I5</i>     | GAAACCAATTGGACACCGAG       | AGAGGGTGGGAGTCCGAG      |
| <i>Lep I1 P1</i>   | CAGTGGGGCTGACAGTCTTC       | CGCCTGTGTATACTGAATGGTG  |
| <i>Lep I1 P2</i>   | GGGTTGGATTTCCATTATCATC     | TGTCTTCATGGTTTCATTAGCC  |
| <i>Lep I1 P3</i>   | TTCATTTTATGGCTAATGAAACCA   | GGCAACAAGTTGTCCCTTGTA   |
| <i>Lep I10</i>     | GAGACTAAGACTTGGAGGGGGT     | CAGCATTTTTAACATTTTCGCA  |
| <i>Lep I11</i>     | GCATCTCTACAGGACCAAGACC     | TGCCTATGACACACCTCAAAC   |
| <i>Lep I12</i>     | AGGCTGAGGTTTAGCAAGACAG     | TTAAACTGGCCATGATTGATTG  |
| <i>Lep I13</i>     | GGGGTGGGGGAAGTATAATAAA     | TCTGGCTGTGGAAAAGCTAAAT  |
| <i>Lep I14</i>     | CTACCTATGGGAATGATCACGG     | TTCCTGTCTTGTGGACACTCTG  |
| <i>Lep I15</i>     | AAACATTGTGGATGATGCTCAG     | TCCCTGCCTTGTAAGGTCTCTA  |
| <i>Lep I16</i>     | TCAAAGGTATATGCCACCACAC     | GAGACTTAAACAAAGGCCTCCC  |
| <i>Lep I17</i>     | AGCTTGCAACAAGCACTCAATA     | GATGGTTGTGAGCTACCATGTG  |
| <i>Lep I18</i>     | CAGTTGACCTGTGCTTCCATAC     | CACTTCTTTCTCCCTGTCTGCT  |
| <i>Lep I19</i>     | AAAGCACCTCAAAGTCTCCCTT     | AGGTTAGCTCTCCAGGTCTCCT  |
| <i>Lep I2</i>      | TGTGGCTGTAACACAATGTCTG     | AGAGTCAGATTGTAACGTGGGC  |
| <i>Lep I20</i>     | GGAGCCATTTGTGACAGTTTTT     | GAGCTAGCCATCAACACTTCCCT |
| <i>Lep I21</i>     | TCCTCCCTTAGTACAGTGTGGG     | TGAGATAAGGGCTGACTCCACT  |
| <i>Lep I22</i>     | TGTAACCAAGCTGCAGAAGAAA     | TAGCTACTCGTGTGCTGGGTAA  |
| <i>Lep I23</i>     | GACTATGAGACTGGAGGATGCC     | GCCTCCTGTCTGAGCCATATAC  |
| <i>Lep I24</i>     | AGAATGGAGCACTAGGTTGCTG     | TGGATGGGGTGTATTAGAAAG   |

|                   |                          |                          |
|-------------------|--------------------------|--------------------------|
| <i>Lep I25 P1</i> | ATGGAACCAAACCTTGAAAGGAG  | AGGATGCTTCTTTAGCCAACAC   |
| <i>Lep I25 P2</i> | TTGGTTCTTTTCCTTTCTCAAGC  | TTATTACAGCATCCCTGGCTCT   |
| <i>Lep I25 P3</i> | AGTTCTTCTTGGTATCTGGGGG   | GGTGCTCTGTAAAGGGAATTGT   |
| <i>Lep I26</i>    | TGATCAGAGTTGATGCAGGAGT   | AAGTGCTGGCCACAGTATACAA   |
| <i>Lep I27</i>    | TGTGACCACTTCTTTCTGCAAC   | TCCTTCCCGACCAAATTTACTA   |
| <i>Lep I28 P1</i> | GCTCATCTTTCTGAGCCTCATT   | TTCTGTTCTTCCTCATCTGGGT   |
| <i>Lep I28 P2</i> | ATATTACCACCGATGGAGGACA   | AGAAACAGGCCTAATGAGATGC   |
| <i>Lep I28 P3</i> | GGAGAAGTTAGCTTTTCTGCCA   | TTACTTAGAGCGCTGGGATTTCT  |
| <i>Lep I29</i>    | GTCTGGGTCCATGATCTCTAGG   | GAATGACACTTTTCAAGAGCCC   |
| <i>Lep I3</i>     | CACAGCTACCAAACCTCCACAG   | CAGTGGAGAGAGACTCACATCG   |
| <i>Lep I4</i>     | CAGCTGTCTCCTTTGGATCTTT   | CATGGTCACCCAGCAATACTAA   |
| <i>Lep I5</i>     | AGATCTTGAGAAACAAAAGCCC   | GATGTCTTCCTGTCTCCAGGTG   |
| <i>Lep I6</i>     | TACAAGGCTGACTCATGACCAC   | CAGACAGCAATACCCTCACTCA   |
| <i>Lep I7</i>     | TTCTTGGATTGTGTTCTTCCCT   | CACACACAAACACACACACACA   |
| <i>Lep I8</i>     | CCCTGTAATTCCATAGTCCCAG   | AGTTATCCATCCTCACAGGCTC   |
| <i>Lep I9</i>     | ACCCTGGGTGACAGATGACTTA   | TCATTTGCCCTTCGATACTTCT   |
| <i>Lipe I1</i>    | CGAACACCTGCAAAGACATTAG   | CTTTGGACTCCTGCATCTCAG    |
| <i>Lipe I2</i>    | GACAGTGTCTCCTCTCCCCTC    | CAGCATGTGGTTCTCACTATCC   |
| <i>Lipe I3</i>    | CAGAAAGCTGTCTCCTCCTCTC   | GCACATGTAAGAATAGCACCCA   |
| <i>Lipe I4</i>    | CCATTCAAGATTCCCTGAAGAC   | AGGACTGGGTCATAGTTGGCTA   |
| <i>Lipe I5</i>    | CTCGTGGAAGTGGGTCAGTT     | GGACTGGAAAGAATTGATGGAG   |
| <i>Lipe I6</i>    | CTTGGTAGCCGTTTGGAGAAG    | TCATGAAGCAGAGCAGTAAGAA   |
| <i>Lipe I7</i>    | TATTCCCCAGAATCAAAGGAAA   | CTGTCAAGAAGAAAATCGAGGC   |
| <i>Lpin1 I1</i>   | GAGGTGCCTGGACTGTTCTTAC   | CAGTTGACTGTGGATAGCTTCG   |
| <i>Lpin1 I2</i>   | AGACTAGGCTTGCCTACAGTGG   | AGCAGGTCATGGTTTGCTTATT   |
| <i>Lpin1 I3</i>   | CAGACTACACAGCCATCCTCAG   | AAGGAGACAGAGCTCCAGACAC   |
| <i>Lpin1 I4</i>   | TGTCCACAGTGTCTTTGTACCC   | TGACTCAGGCAGAGAGGTGATA   |
| <i>Lpin1 I5</i>   | AGCACTAATGCCTAGGGCTTCT   | GTGTGTGGGGATTCTCTTCTTA   |
| <i>Lpin1 I6</i>   | CAGGAGATGGTCGCACTATACA   | GTTATTTCCCCTCTTCCGACTT   |
| <i>Lpl I1</i>     | AAGAAGAAGAAGGAGGAGGAGG   | TTGCCTTAGTGTCCCTTCCTAA   |
| <i>Lpl I10</i>    | CGGTAGGCAAACCTGGAGTCTAA  | GCACAGCTGTTTAAAGTACTGG   |
| <i>Lpl I11</i>    | CTCAGTCGTAAAAGAAGGCTGG   | GTTCTGCCATGATGGATTCTCT   |
| <i>Lpl I12</i>    | GCAGGAAAGCAGAGAGCTAAAA   | CAGTCTGTCAAAGGCACTGAAC   |
| <i>Lpl I13</i>    | GACAGGGTTTCTCTGTGTAGCC   | AATCTGATTCTGCCCAACAAGT   |
| <i>Lpl I14</i>    | ACATAGTCTCGGTGGCAGGATA   | TGTACACATACACAAGCAGGTCTC |
| <i>Lpl I15</i>    | TTATCTCATTGTTCATTTCTCTGA | AAAGGAAAAATCGCTAAGTTGC   |
| <i>Lpl I2</i>     | AGAGGATGAAGTACCAACCTGC   | TTAGTGTCTGAGAAGTGCAGC    |
| <i>Lpl I3</i>     | CTCCTGTTTGTCTCTCCACAC    | CACTTCTGAAACTCTGCTGACG   |
| <i>Lpl I4</i>     | TATTTGGGTACCGATTTCTCCA   | ACTAAGCCATCTCCCTAGCCTT   |
| <i>Lpl I5</i>     | ACAAGAGAGAGCATGCATTGAA   | TGCATCTCCAAACAGTGTTCTT   |
| <i>Lpl I6</i>     | AGCACATTACAGATAAGGGCGT   | AAAAGTTCAGCGGAAAACACAT   |
| <i>Lpl I7</i>     | TGGAAAAGGATCCCTCACTCTA   | TCCATGCCCAAACCTTATACACA  |
| <i>Lpl I8</i>     | AAAGTTCCAGGTAGCAGTGCAG   | GAAATGGCAGAGATACTCCAGG   |
| <i>Lpl I9</i>     | TCCCCTGAAAATCCAGGATAG    | GGGACCTTAGGACACATATTGC   |
| <i>Npr3 I1</i>    | ATAAACCCCTTCTTTCCCTCCCCT | ACTTCAGAACCCACTACCTTGG   |

|                   |                         |                         |
|-------------------|-------------------------|-------------------------|
| <i>Npr3 I10</i>   | TATTACTACCCGGTATGCCCTG  | AGGGTGCTAGCCATAACGTAAG  |
| <i>Npr3 I11</i>   | CCCTAAGCCTTCGCTGTAAGTA  | ACAAATGTTTGCTCTCCCAAGT  |
| <i>Npr3 I12</i>   | GTCACGCAGCAAAGACATTTAC  | CTATGACTTAACAGCAGCAGCC  |
| <i>Npr3 I13</i>   | TACACACACACTGCAAAAACGA  | CTCTGCAAATGAATTTTCCTGC  |
| <i>Npr3 I14</i>   | CATTCTTACATCAGGGCTCCTC  | TTAATCCTGGGGTTGGAGAAAG  |
| <i>Npr3 I15</i>   | TATATTCTCCCTCCCTTTGCAC  | TATTTAAACCCCGGCTATGGAT  |
| <i>Npr3 I16</i>   | CGAGAAAGTGAACAGCAGCA    | GAGGAATCTTCCTATCTTTTGGC |
| <i>Npr3 I17</i>   | GGACCCGTGGGAAGGAAG      | TCCACTGACCCTAGGTCTCTTT  |
| <i>Npr3 I18</i>   | CCCTGGCTCATAAAGGTAGAAG  | GAGCTTTAGGCAGAGAAGACCA  |
| <i>Npr3 I19</i>   | CACTGATTACCACCAACAGAGC  | TCACTTGTGCTTGTTAACGATGT |
| <i>Npr3 I2</i>    | CACGATTCTCCTGAGATCCTTC  | CTATATGGAATTCCTTTGGCCG  |
| <i>Npr3 I20</i>   | AACTGCAGATTGCTTAACTCCC  | AGGGTCTGTTCTATCCTAGGGC  |
| <i>Npr3 I21</i>   | CATGCACACTAGAAAACACGGT  | TACCTGCTTTATGAGATGCCCT  |
| <i>Npr3 I22</i>   | GCTATAAATTGCCTTACCACGC  | GTCAGTCAGATCCTGGCTCTCT  |
| <i>Npr3 I3</i>    | TCTTCATTGCCCTTCATTCTTT  | AGCAGGTGCTGTTAATATGGGT  |
| <i>Npr3 I4</i>    | GTCACAAACCACCCACACTCTA  | CGAGACACTGATTTATTTGTGGA |
| <i>Npr3 I5</i>    | TCTTTCTTTCCGGCAGTACATT  | CATGACAACCTGGATGAAGCAAT |
| <i>Npr3 I7</i>    | GTAGCCTTCAAGGGCTTCTCTT  | CCGCAGAGTTCTTTTTACTCCA  |
| <i>Npr3 I8</i>    | CGCTATTGAAGAAACGAGAGAAA | AAGCTCTGTGCTTTCAGAGAA   |
| <i>Npr3 I9</i>    | CTGAAACTCGTGAAGTGAGGGT  | GGTTTTTGGATATGTGTCAGGG  |
| <i>Pck1 I1</i>    | GATGCTATGGACTAAACTGCCC  | ACAAGCTAATTGCTTCCTGAGC  |
| <i>Pck1 I10</i>   | AGCTGACAGTGCATTCGATTTA  | TGCATAGTTACCACAAAAACCG  |
| <i>Pck1 I11</i>   | GAACCTCCAGAGAGAGGGTCAGC | CTCCCTACATCGACAACAAGGT  |
| <i>Pck1 I12</i>   | ATGTCTCTGCCCTTACTCTGA   | GTCTTGAATGCCCAAGTGTCT   |
| <i>Pck1 I13</i>   | GGTAACACACCCCAGCTAACTC  | AGGCTCTTGCCTTAATTGTCAG  |
| <i>Pck1 I14</i>   | CTCACTATGGCTGATAGAGGGG  | CGCCCTCCTTGCTTTAAATACT  |
| <i>Pck1 I2</i>    | GCAATTAGCTTGTGGCTTCTGT  | TTACATCTTTAACCCAGGCACC  |
| <i>Pck1 I3</i>    | GTTGAGCTAGCAGAACGGATG   | TAAGCCCCATGACAAATACCTC  |
| <i>Pck1 I4</i>    | TTTGATGCACTTGAAAACATCC  | TATCCAGTTGTGCCTGTGTCTC  |
| <i>Pck1 I5</i>    | TAACCTAAAAATGCCCAGGAGC  | ATGAAGTGCTGTGCTCTGTGTT  |
| <i>Pck1 I6 P1</i> | ATGGCTTTGAACAGACAGTGAC  | TCAGTCTCTCCACAGCATTAG   |
| <i>Pck1 I6 P2</i> | GGGGAGGTAGAAGAGGAGTTTG  | CCCTCTGTGTTGGCTTTTATTC  |
| <i>Pck1 I6 P3</i> | TAAGTGTGTAATTGTGGGCTGC  | CGTGTTTCCCAAACAAAGTACA  |
| <i>Pck1 I6 P4</i> | GAATAAAAGCCAACACAGAGGG  | AACACCTGCAAACCTTACCAAG  |
| <i>Pck1 I7 P1</i> | GCGAAACAAAGGTTTCTAGCAT  | TTCATCACTTGCTCTGAAGTGG  |
| <i>Pck1 I7 P2</i> | AAAGGTTTCTAGCATGCAGTCC  | ACCAAATGAAGGAAGGAAAAA   |
| <i>Pck1 I7 P3</i> | ACCACTTCAGAGCAAGTGATGA  | GGGCAATTTACCATCTGAAAAG  |
| <i>Pck1 I8</i>    | CTAAAGTGGCTTGTTCAAGGCTT | TGGGTAAGCACATCTTCATAA   |
| <i>Pck1 I9 P1</i> | GTAGTTTCAACCCCCTGTACGA  | AGACAAACAGACGAATGTTCCA  |
| <i>Pck1 I9 P2</i> | ACACGTGCCACCTAAAACCTTC  | AGCCACTTTGAAAAAGAACAGG  |
| <i>Pck1 I9 P3</i> | AATGTCACTTGTGGAACATTCG  | ATTTAAATGAGAGCCTGGGTGA  |
| <i>Pck1 I9 P4</i> | AAGTCACTCCCCGATGAAAGT   | TTAACGATCAATTCTTTGTGGG  |
| <i>Pck1 I9 P5</i> | ATCTACAAATGTCACCCAGGCT  | GAGAAAGGGAGAGAACACATGC  |
| <i>Plin I1</i>    | ACTTACAGGGAGGTCTCCATCC  | CTCCTATGTAACATTCGCCCTC  |
| <i>Plin I10</i>   | ATTTGTCCAGCAACACTAGGCT  | GTGGAACAAACATTTGGTTTTG  |

|                     |                          |                           |
|---------------------|--------------------------|---------------------------|
| <i>Plin 12</i>      | GAAGGTCTCCTCCTCAGAAACA   | CAGCTCTGAGAACCACCTCTTT    |
| <i>Plin 13</i>      | CTGGCTTTCAATGGACAGAAAT   | CTATCCCTGTGTGGGTTTGAAT    |
| <i>Plin 14</i>      | CACACCCCAAATAAATGCATAA   | CCAAAGGCTCAGACCAAGATTA    |
| <i>Plin 15</i>      | CTTTGGGCTGTAAGACAGCAG    | TTTCACCCACATCCTAGAATCC    |
| <i>Plin 16</i>      | AGGCATTTGCTGGTATTTGTCT   | CACACTTCACGGTTCAGTCTTC    |
| <i>Plin 17</i>      | CTTTCCTGTCCCTCTCAGTTGT   | AGTTGATGGTTTCTGTCCCAGT    |
| <i>Plin 18</i>      | CTTGCTTGCTCCTAGCATTACC   | TCCCAGCTCTGCTTAAGTTTTC    |
| <i>Plin 19</i>      | GAAAACCTAAGCAGAGCTGGGA   | TCCTATGAGCAGAGGTAGGACC    |
| <i>Pnpla2 I1</i>    | GCTTGTGCTGCTTAAGGTTCTT   | GAAACAAGTCCACAGTAAGCCC    |
| <i>Pnpla2 I2</i>    | CATTCTCTTGGTGCCCATGTA    | AGAGTCACAGCAGTTTGTAGCG    |
| <i>Pnpla2 I3</i>    | CCCACCTTAGATCTGGCCAAGTA  | GCCACTTAAAGAAGAAGGCAGA    |
| <i>Pparg I1</i>     | ACCCAATGAGTTGCTTGTAGGT   | TACCAAGCCCCTATACTGCCTA    |
| <i>Pparg I10</i>    | AGGCCATTGTGTTTTATCATGC   | AGCCAGCATCACTACTGTCTGA    |
| <i>Pparg I11</i>    | CAACCTACTATGTTTGAATGCCA  | GATTTGAATTTCTTTGATTGATTTG |
| <i>Pparg I12</i>    | AGTTTGGCACAGCTAGGTTTTT   | TGCAGTAGTATTCCAATGGTTGA   |
| <i>Pparg I13</i>    | GAACAGTGAATGTGTGGGTCAC   | GGCTTATGGTCATCGAGCTTAT    |
| <i>Pparg I14</i>    | CTGTGTTTATTCCCACCTCTCC   | CTTGTGAAGTGCTCATAGGCAG    |
| <i>Pparg I15</i>    | GCATGTTTGTTTTCCACATGTATT | TTCACCAAGTGTTCTGAAATGC    |
| <i>Pparg I16</i>    | AACCTCATGTTGGCTCTGATTT   | ATTGCAGCATTGTGCATGTTTC    |
| <i>Pparg I17</i>    | GTCACACTGCATGTTTCCTTTC   | TGGCCTGGAAAGTCTGTTTTAT    |
| <i>Pparg I18</i>    | GCCAAGTTTGAAGGTCAAAAAG   | CATGAAAGAGCAAATGGACAAA    |
| <i>Pparg I19 P1</i> | ACAGGACTCATGTCACCCATCT   | TCCAGGAAAGCTGCTTCTTATT    |
| <i>Pparg I19 P2</i> | TGTTCACGCAAATATTTTGTC    | TTTCCCTTTCTGTATTCTGGGA    |
| <i>Pparg I19 P3</i> | AGCTTTCCTGGACCATCTCTAA   | CCTTACTTTTCTAAGCAGGGGG    |
| <i>Pparg I2 P1</i>  | CTTGGCAGGACAGAGGAGATTA   | AATCTTAAAAGGAGCCCACACA    |
| <i>Pparg I2 P2</i>  | GCCAGGACAAGAAACAATTAGG   | TCGCAGATAAGCAATCACAAAT    |
| <i>Pparg I2 P3</i>  | TTGTGTGGGCTCCTTTTAAGAT   | GCTCCATGGGAATTTAGATTTG    |
| <i>Pparg I2 P4</i>  | ATTTGTGATTGCTTATCTGCGA   | TCATTTTTACCATGCTCTCTGG    |
| <i>Pparg I20</i>    | TCACCAATGCACACTCTTCTTT   | TCCACGAGAAAACAAAGTTCCT    |
| <i>Pparg I3</i>     | TGATTTTATTATAAGGAGGGGCT  | GTGGGTTGAAAGAATCCATAGG    |
| <i>Pparg I4</i>     | CTATGGATTCTTTCAACCCACC   | TAATTGCAGCCATAACTTTCCC    |
| <i>Pparg I5</i>     | AAACATTTACATGTAGCAGGC    | TGTCTTGCTTGGGGTTTTAGTT    |
| <i>Pparg I6</i>     | GTGACCTTCCGTGTTAGGAGTC   | CTCTCCTCCCTTGTACCTCTGA    |
| <i>Pparg I7</i>     | TGTATCTCCTGTTTTGGAAGCC   | AAACACTAAAGGTTACACCGGG    |
| <i>Pparg I8 P1</i>  | TAAGTGCACAGTTCCCAAATG    | CAAAATCTTTATGGGGATCCAA    |
| <i>Pparg I8 P2</i>  | AGTACATGGGAGAAACAATGGG   | CACATTGAAATGAGAAGTGGGA    |
| <i>Pparg I8 P3</i>  | ATCCCCATAAAGATTTTGGCTT   | TTGAGCCTTAACTCAGTCCCTC    |
| <i>Pparg I9</i>     | TATCTGCAGAAACCTGGAAAGG   | TCCACAGGGATTTTCAGTCTTT    |
| <i>Retn I1</i>      | CAAGACACTGGATCAGAAGCTG   | TCAAGCCAATACTGACCCTACA    |
| <i>Retn I2</i>      | TTATCTCCAGACAACGTCCTGA   | GTATTAGCTCCTGTCCCACAGC    |
| <i>Scd1 I1</i>      | ACAATGTATGCCAAATGTAGCG   | AAGGATGTAAATGCTCTGGAGG    |
| <i>Scd1 I10</i>     | TCAGGAGCAGAGTGTGATCAAG   | TGTGACTGTCCACACACAGAAG    |
| <i>Scd1 I11</i>     | ATTCCAGAGTAGACCTTGGAGG   | GGATAAGGAGAAAAAGAGGGGA    |
| <i>Scd1 I12</i>     | CCGTTGGTGTAGGCGAGT       | TTCCTTGGCTAGCTATCTCTGC    |
| <i>Scd1 I13</i>     | TCTTAACCTGTGTCTCACGCTC   | CAACTTTCGTGCCTTTAGCTTT    |

|                  |                         |                         |
|------------------|-------------------------|-------------------------|
| <i>Scd1 12</i>   | AGGTTTGGATTCTGTACACCGT  | GCCCCAAGACACTAACTGTAGG  |
| <i>Scd1 13</i>   | AAGAGCTTCCATCCCTTTGTCT  | AGAGTCATACAAGGCTGATCCC  |
| <i>Scd1 14</i>   | TAATGAGATCTGACGCCCTCTT  | ACTCACACAGACAGACGTCCAC  |
| <i>Scd1 15</i>   | ATTGTAGGAAGTCCTAAGGGGG  | TATGGTGCAAAGACAGAAATGG  |
| <i>Scd1 16</i>   | TTTGACCTCTGTTTACCCGTCT  | AGTACTGAGCCCTTTTCCTCCT  |
| <i>Scd1 17</i>   | GTGAATGTAACCTGTGGTGCCTT | AAAGAAGTTTGCCTCAGTGGTC  |
| <i>Scd1 18</i>   | TGTTGACTGAGCTTCCTCTGTG  | CTAGAAGGCCTCTCCTTCCCTA  |
| <i>Scd1 19</i>   | CATGTAACCTCTGCTTCCACAG  | CATGGGAGAATCACAGACTCCT  |
| <i>Slc2a4 11</i> | CTCTACACTGGTTCTTGGAGGG  | AGCTCTCTCTCCACATTCTTCG  |
| <i>Slc2a4 12</i> | GAGATGATCCAAGGGACCAATA  | GCTCAGGGACTTCAGGGAG     |
| <i>Slc2a4 13</i> | TATGTGTGTATGCCCCGAAGTA  | AGGCATGGTCTCCAGATACT    |
| <i>Slc2a4 14</i> | GATCTAGTGAGACCCGCTTGAG  | CTTTGAAAACCTCAGAAGCAGGC |
| <i>Slc2a4 15</i> | CACAGTCTGTCTCCAAGAGGAA  | ACACTCTGCCACGACTCTATT   |
| <i>Slc2a4 16</i> | TAACAGTATCCCAGACAGTGCC  | TACTTGGTCCCAGTTTAGGAGC  |
| <i>Sreb1 11</i>  | TGGAAAAGCTCTCTTATCCTGG  | GCCCCCTAGTGTTATGCTCACT  |
| <i>Sreb1 110</i> | AAGACTGAAGGCCATGAGAGC   | CAGGTCACTACTGACTCTCCCA  |
| <i>Sreb1 12</i>  | TAAACCGTTTGTGTTGACACCCT | CTAATGTTGAGTGGGCATGAGA  |
| <i>Sreb1 13</i>  | AGAGGCCACCAATTTCC       | GGGCCTGACAGGTGAAATC     |
| <i>Sreb1 14</i>  | TTCTCCCGGTGCTCTGAAT     | TAAAATGGTCCAGGCAAGTTCT  |
| <i>Sreb1 15</i>  | ATCTCGGCCAGTGTCTGTTC    | CAGGAGATTGCTAGAAACCAGG  |
| <i>Sreb1 16</i>  | TGGTTTTCCCCAGTCAACTTAC  | TCTGTGGAGCAGAGATTTGTGT  |
| <i>Sreb1 17</i>  | TCTTGCATTGGAGACAGTCG    | AATCTGCACTTTAGAAGCCCTG  |
| <i>Sreb1 18</i>  | TAAGGAGTCGTGTGGGCTAACT  | GGGTTCTTGTCCCTGTCTTATG  |
| <i>Sreb1 19</i>  | TTTCTTTTACTGCTGCCTGATG  | AAAGTCCTTAGAAGCTGGGTCC  |

Some islands were too large to be effectively amplified with a single set of primers; these regions were amplified by overlapping sets of primers designated P1, P2, P3, etc.

**Table S6. C<sub>T</sub> Values for Retrovirally Expressed IRF Isoforms in Day 0 3T3-L1 Preadipocytes**

| Isoform | C <sub>T</sub> |
|---------|----------------|
| IRF1    | 16.56          |
| IRF2    | 17.62          |
| IRF3    | 16.74          |
| IRF4    | 17.26          |
| IRF5    | 17.66          |
| IRF6    | 16.69          |
| IRF7    | 17.26          |
| IRF8    | 17.95          |
| IRF9    | 17.42          |
